# Supplementary material for: Potential of Prevention Strategies For The Modifiable Risk Factor Type 2 Diabetes On The Future Number of Dementia Patients in Germany– A Multi-State Projection Through 2040
Source: Research Square preprint supplement (doi:10.21203/rs.3.rs-538620/v2), 2021-07-19
Supplement: Supplementary file 1 [file 01dd2ca96ce75ea4c21d7ec7.docx]

Potential of prevention strategies for the modifiable risk factor type 2 diabetes on the future number of dementia patients in Germany– A multi-state projection through 2040

Authors: Anne Fink1, PhD; Ilja Demuth2,3, Prof. & Gabriele Doblhammer1,4, Prof.

**SUPPLEMENTAL MATERIAL**

Figure S1: Composition of study population (AOK) and total German population (HMD) by sex and age. Source: AOK 2014-2017 and HMD.

**Validation of diagnoses**

1. Validation strategy of dementia diagnoses

First, from the inpatient sector only discharge or secondary diagnoses were considered. Outpatient diagnoses had to be marked with the modifier “verified”. Second, diagnoses were defined as valid if they appeared simultaneously in both the inpatient and outpatient sectors, or if two different types of physicians each made the diagnosis in the same quarter. Furthermore, a diagnosis could be confirmed by a second occurrence over the course of the analysis period. If a person died in the same quarter the first diagnosis was made, that diagnosis was considered to be valid even if there was no confirmative diagnosis.

1. Validation strategy of diabetes diagnoses

We only considered inpatient discharge or secondary diagnoses and outpatient diagnoses which were marked as verified. A diabetes diagnosis was assumed to be valid if the diagnosis could be confirmed by a second one, or if the diagnosis occurred in the quarter of death.

**Calculation of population size in each state**

The population size at time t+1 of age x in state 1 (Diab-Dem-) was calculated by (separately by sex):

, with

… Population in age (x-1) at time t

… Internal emigration probability in age (x-1) at time t from state 1 to state s

…Survival ratio in age (x-1) at time t

The population size at time t+1 of age x in state 2 (Diab+Dem-) was calculated by (separately by sex):

, with

… Population in age (x-1) at time t

… Internal emigration probability in age (x-1) at time t from state 2 to state s

… Internal net immigrants in age x at time t from state 1 to state 2, calculated by

…Survival ratio in age (x-1) at time t

The population size at time t+1 of age x in state 3 (Diab-Dem+) was calculated by (separately by sex):

, with

… Population in age group (x-1) at time t

… Internal emigration probability in age (x-1) at time t from state 3 to state s

… Internal net immigrants in age x at time t from state s to state 3, calculated by

…Survival ratio in age (x-1) at time t

The population size at time t+1 of age x in state 4 (Diab+Dem+) was calculated by (separately by sex):

, with

… Population in age (x-1) at time t

… Internal net immigrants in age x at time t from state s to state 4, calculated by

…Survival ratio in age (x-1) at time t

**Calculation of transition probabilities**

We calculated firstly the probability to stay in the state 1 (Diab-Dem-) , for example, by:

*.*

The probability to transit from state 1 (Diab-Dem-) to state 2 (Diab+Dem-), for example, was then calculated by:
